# Supplementary material for: Human supplementation with Pediococcus acidilactici GR-1 decreases heavy metals levels through modifying the gut microbiota and metabolome
Source: PubMed Central journal article supplement (PMC9381558; doi:10.1038/s41522-022-00326-8), 2022-08-16
Supplement: 41522_2022_326_MOESM1_ESM.pdf [file 41522_2022_326_MOESM1_ESM.pdf]

# SUPPLEMENTARY INFORMATION

## Title

Human supplementation with *Pediococcus acidilactici* GR-1 decreases heavy metals levels through modifying the gut microbiota and metabolome

## Authors

Pengya Feng <sup>a,#</sup>, Jinfeng Yang <sup>a,#</sup>, Shuai Zhao <sup>a,#</sup>, Zhenmin Ling <sup>a</sup>, Rong Han <sup>b</sup>, Ying Wu <sup>a</sup>, El-Sayed Salama <sup>c</sup>, Apurva Kakade <sup>a</sup>, Aman Khan <sup>a</sup>, Wei lin Jin <sup>d</sup>, Weibing Zhang <sup>b</sup>, Byong-Hun Jeon <sup>e</sup>, Jingjing Fan <sup>a</sup>, Minrui Liu <sup>b</sup>, Tursunay mamtimin <sup>a</sup>, Pu Liu <sup>a,\*</sup>, Xiangkai Li <sup>a,\*</sup>

a. Ministry of Education Key Laboratory of Cell Activities and Stress Adaptations, School of Life Science, Lanzhou University, Lanzhou, Gansu 730000, P. R. China

b. College of Life Science and Technology, Gansu Agricultural University, Lanzhou, 730070, PR China

c. Department of Occupational and Environmental Health, School of Public Health, Lanzhou University, Lanzhou, Gansu 730000, P. R. China

d. Institute of Cancer Neuroscience, Medical Frontier Innovation Research Center, The first Hospital of Lanzhou University, The First Clinical Medical College of Lanzhou University, Lanzhou 730000, P. R. China

e. Department of Earth Resources and Environmental Engineering, Hanyang University, Seoul 04763, South Korea

\*Correspondence: [xkli@lzu.edu.cn](mailto:xkli@lzu.edu.cn); [liupu@lzu.edu.cn](mailto:liupu@lzu.edu.cn). Tel.: +86-931-8912560

# These authors contribute equally to this work.

28

29 **TABLE OF CONTENTS**

30 SUPPLEMENTARY TABLE P 3-23

31 SUPPLEMENTARY FIGURE P 24-36

32

33

34

35

36

37

38

39

40

41

42

43

44

45

46

47

48

49

50

51

## SUPPLEMENTARY TABLE

52

**Supplementary Table 1** Blood and urine levels of Cu and Ni at the time of recruitment

53

and comparisons to the levels found in a developed country.

54

| <b>Study group</b> | <b>Sample category</b> | <b>Students (H)</b><br>AVE±SD (Range) | <b>Occupational workers (O)</b><br>AVE±SD (Range) | <b>FC (O/H)</b> | <b>FC (H/RV<sup>a</sup>)</b> | <b>FC (O/RV<sup>a</sup>)</b> |
|--------------------|------------------------|---------------------------------------|---------------------------------------------------|-----------------|------------------------------|------------------------------|
| <b>Cu</b>          | <b>Blood</b>           | 627.7±106.7<br>(470.6-938.6)          | 1260.94±213.7<br>(851.0-2205)                     | 2.00            | 0.63                         | 1.26                         |
|                    | <b>Urine</b>           | 28.30±14.54<br>(7.433-55.5)           | 53.64±32.79<br>(20.43-337.4)                      | 1.90            | 1.13                         | 2.15                         |
| <b>Ni</b>          | <b>Blood</b>           | 1.100±0.3020<br>(0.6829-1.936)        | 4.960±3.323<br>(0.02281-13.10)                    | 4.51            | 1.00                         | 4.51                         |
|                    | <b>Urine</b>           | 3.963±1.983<br>(1.204-8.97)           | 16.19±10.82<br>(5.308-70.63)                      | 4.09            | 0.90                         | 1.41                         |

55

56

**H**, students as healthy control; **O**, occupational workers; **RV**, the reference value; **FC**,

57

fold change.

58

**a.** The RV of blood Cu and Ni level is 1000 ug·L<sup>-1</sup> (1000-1100 ug·L<sup>-1</sup>) for males and

59

1.1 ug·L<sup>-1</sup> (0.85-1.3 ug·L<sup>-1</sup>), respectively, and the RV of urine Cu and Ni level is 25

60

ug·L<sup>-1</sup> (22-28 ug·L<sup>-1</sup>) and 4.4 ug·L<sup>-1</sup> (3.8-5.0 ug·L<sup>-1</sup>), respectively, which are based on

61

the Canadian health measures survey 2007-2013 (Saravanabhavan, Werry et al. 2017).

62

63 **Supplementary Table 2** The composition and dose of the yogurt used in this study.

64

|                        | <b>Probiotic composition</b>                         | <b>Dosage</b>                                                                    | <b>Duration</b> |
|------------------------|------------------------------------------------------|----------------------------------------------------------------------------------|-----------------|
| Probiotic yogurt       | <i>Lactobacillus bulgaricus</i><br>(commercial)      | 10 <sup>10</sup> cfu of each<br>bacteria in one carton of<br>probiotic yogurt    | 12 weeks        |
|                        | <i>Streptococcus thermophilus</i><br>(commercial)    | (250g) consumed<br>daily                                                         |                 |
|                        | <i>Pediococcus acidilactici</i> GR-1<br>(laboratory) |                                                                                  |                 |
| Conventional<br>yogurt | <i>Lactobacillus bulgaricus</i><br>(commercial)      | 10 <sup>10</sup> cfu of each<br>bacteria in one carton of<br>conventional yogurt | 12 weeks        |
|                        | <i>Streptococcus thermophilus</i><br>(commercial)    | (250g) consumed daily                                                            |                 |

65

66

67 **Supplementary Table 3** Blood heavy metals level and biochemical measurements at  
 68 baseline in worker participants.

69

| Characteristics | Baseline               |                               | <i>P</i> value |
|-----------------|------------------------|-------------------------------|----------------|
|                 | Conventional<br>(n=76) | yogurt<br>Probiotic<br>(n=76) |                |
| Blood Cu (µg/L) | 1275 ± 219.9           | 1246 ± 207.7                  | 0.4171         |
| Urine Cu (µg/L) | 55.63 ± 38.81          | 55.64 ± 25.67                 | 0.9979         |
| Blood Ni (µg/L) | 5.065 ± 3.271          | 4.855 ± 3.392                 | 0.6982         |
| Urine Ni (µg/L) | 16.18 ± 10.76          | 16.20 ± 10.95                 | 0.9934         |
| TBIL(µmol/L)    | 15.63 ± 8.478          | 15.02 ± 6.082                 | 0.6140         |
| DBIL(µmol/L)    | 5.593 ± 2.948          | 5.353 ± 2.133                 | 0.5659         |
| IBIL(µmol/L)    | 10.04 ± 5.614          | 9.605 ± 4.154                 | 0.5893         |
| TP (g/L)        | 77.05 ± 3.813          | 78.05 ± 3.303                 | 0.0844         |
| ALB (g/L)       | 45.99 ± 2.122          | 46.54 ± 1.763                 | 0.0880         |
| GLB (g/L)       | 31.05 ± 2.998          | 31.52 ± 2.833                 | 0.3306         |
| A/G             | 1.494 ± 0.1508         | 1.488 ± 0.1444                | 0.7882         |
| PA (mg/dL)      | 26.33 ± 4.658          | 27.55 ± 4.119                 | 0.1508         |
| ALT (U/L)       | 30.53 ± 19.50          | 26.21 ± 13.88                 | 0.1180         |
| AST (U/L)       | 23.99 ± 8.255          | 23.01 ± 5.821                 | 0.4020         |
| AST/ALT         | 1.218 ± 0.4153         | 1.094 ± 0.378                 | 0.3696         |
| ALP (U/L)       | 97.50 ± 25.46          | 93.30 ± 24.27                 | 0.2999         |
| GGT (U/L)       | 40.71 ± 47.05          | 35.58 ± 25.85                 | 0.4060         |
| TBA (µmol/L)    | 5.726 ± 4.861          | 5.849 ± 3.822                 | 0.8628         |
| CHE (U/L)       | 8691 ± 1937            | 9074 ± 1598                   | 0.1862         |
| BUN (mmol/L)    | 5.684 ± 1.229          | 5.558 ± 1.10                  | 0.5084         |
| UA (µmol/L)     | 344.4 ± 88.73          | 334.4 ± 78.89                 | 0.4645         |
| CREA (µmol/L)   | 70.75 ± 10.35          | 72.14 ± 10.17                 | 0.8128         |

70

71 All data are expressed as mean ± standard deviation (SD). Analysis of two-tailed Mann-  
 72 Whitney U was performed to compare the two groups at baseline. Data with  $p > 0.05$  are

73 not significant. TBIL, total bilirubin; DBIL, direct bilirubin; IBIL, indirect bilirubin;  
74 TP, total protein; ALB, albumin; GLB, globulin; A/G, the ratio of albumin to globulin;  
75 PA, prealbumin; ALT, alanine aminotransferase; AST, aspartate amino transferase; ALP,  
76 alkaline phosphatase; GGT,  $\gamma$ -gultamyltransferase; TBA, total bile acid; CHE,  
77 cholinesterase; BUN, urea nitrogen; UA, uric acid; CREA, creatinine. The reference  
78 value for TBIL, DBIL, IBIL, TP, ALB, GLB, A/G, PA, ALT, AST, ALP, TBA, CHE,  
79 BUN was 2.0-20.4, 0.0-7.0, 3.00-15.00, 62.0-85.0, 35.0-53.0, 20.00-35.00, 1.50-2.50,  
80 10.00-40.00, 0-38, 0-38, 0.00-3.00, 40-150, 0.00-15.00, 4000-11000, 1.7-8.3,  
81 respectively. Data were presented as mean  $\pm$  SD.

82

83 **Supplementary Table 4** Interval division based on reference value from Canadian  
84 health measures survey 2007-2013 (Saravanabhavan, Werry et al. 2017).

85

| <b>Ni (µg/L)</b> | <b>Cu (µg/L)</b> | <b>Level grade</b> |
|------------------|------------------|--------------------|
| 1.1              | 1000             | Normal value       |
| <1.1             | <1000            | Low                |
| 1.1-6.0          | 1000-1300        | Medium             |
| >6.0             | >1300            | High               |

86

**Supplementary Table 5** Effect of 12-week intervention with conventional yogurt and probiotic yogurt on hepatic and renal function characteristics in the whole group of participants.

| Characteristics           | Baseline            | Intervention       | Baseline            | Intervention       | <i>P</i> for        | <i>P</i> for     |
|---------------------------|---------------------|--------------------|---------------------|--------------------|---------------------|------------------|
|                           | Conventional yogurt | Probiotic yogurt   | Conventional yogurt | Probiotic yogurt   | Conventional yogurt | Probiotic yogurt |
| TBIL( $\mu\text{mol/L}$ ) | 15.55 $\pm$ 8.313   | 15.68 $\pm$ 5.14   | 14.96 $\pm$ 6.019   | 12.89 $\pm$ 6.273  | 0.9419              | 0.1095           |
| DBIL( $\mu\text{mol/L}$ ) | 5.526 $\pm$ 2.904   | 5.371 $\pm$ 2.05   | 5.336 $\pm$ 2.109   | 4.667 $\pm$ 2.113  | 0.7986              | 0.1128           |
| IBIL( $\mu\text{mol/L}$ ) | 10.03 $\pm$ 5.5     | 10.31 $\pm$ 3.285  | 9.557 $\pm$ 4.111   | 8.224 $\pm$ 4.34   | 0.8026              | 0.1431           |
| TP (g/L)                  | 77.24 $\pm$ 3.829   | 74.74 $\pm$ 3.073  | 77.94 $\pm$ 3.337   | 73 $\pm$ 3.415     | 0.0027              | <0.0001          |
| ALB (g/L)                 | 45.97 $\pm$ 2.084   | 45.24 $\pm$ 1.959  | 46.48 $\pm$ 1.794   | 43.83 $\pm$ 1.823  | 0.1101              | <0.0001          |
| GLB (g/L)                 | 31.26 $\pm$ 3.097   | 29.5 $\pm$ 2.391   | 31.46 $\pm$ 2.831   | 29.17 $\pm$ 3.026  | 0.0081              | 0.0002           |
| A/G                       | 1.485 $\pm$ 0.1547  | 1.543 $\pm$ 0.1393 | 1.488 $\pm$ 0.1444  | 1.518 $\pm$ 0.1758 | 0.0868              | 0.2802           |
| PA (mg/dL)                | 26.19 $\pm$ 4.700   | 33.28 $\pm$ 4.998  | 27.44 $\pm$ 4.201   | 24.97 $\pm$ 5.500  | <0.0001             | 0.0178           |
| ALT (U/L)                 | 30.09 $\pm$ 19.17   | 33.3 $\pm$ 16.05   | 26.69 $\pm$ 14.46   | 26.24 $\pm$ 15.57  | 0.4362              | 0.8808           |
| AST (U/L)                 | 23.95 $\pm$ 8.080   | 24.19 $\pm$ 6.221  | 23.12 $\pm$ 5.889   | 22.85 $\pm$ 8.247  | 0.8906              | 0.8488           |
| AST/ALT                   | 1.203 $\pm$ 0.4122  | 1.338 $\pm$ 0.4413 | 1.106 $\pm$ 0.378   | 1.161 $\pm$ 0.5276 | 0.1501              | 0.9004           |
| ALP (U/L)                 | 96.89 $\pm$ 25.86   | 92.56 $\pm$ 28.11  | 93.15 $\pm$ 24.13   | 88.43 $\pm$ 21.01  | 0.4632              | 0.2314           |
| GGT (U/L)                 | 39.48 $\pm$ 46.17   | 34.3 $\pm$ 15.58   | 35.53 $\pm$ 25.64   | 39.29 $\pm$ 77.33  | 0.5696              | 0.0533           |
| TBA ( $\mu\text{mol/L}$ ) | 5.581 $\pm$ 4.782   | 3.944 $\pm$ 2.185  | 5.767 $\pm$ 3.807   | 6.080 $\pm$ 3.208  | 0.0893              | 0.9539           |
| CHE (U/L)                 | 8611 $\pm$ 1925     | 5609 $\pm$ 2145    | 9061 $\pm$ 1580     | 8618 $\pm$ 1501    | <0.0001             | 0.1911           |



|               |               |               |               |               |        |        |
|---------------|---------------|---------------|---------------|---------------|--------|--------|
| BUN (mmol/L)  | 5.605 ± 1.261 | 5.343 ± 1.215 | 5.515 ± 1.12  | 5.108 ± 1.395 | 0.3486 | 0.1212 |
| UA (μmol/L)   | 339.6 ± 89.46 | 346.3 ± 58.25 | 333.5 ± 78.32 | 347.1 ± 90.11 | 0.7192 | 0.6431 |
| CREA (μmol/L) | 70.73 ± 11.06 | 79.19 ± 15.02 | 72.24 ± 10.12 | 67.97 ± 13.08 | 0.0023 | 0.0529 |

All data are expressed as mean ± standard deviation (SD). Analysis of two-tailed Mann-Whitney U was performed to compare the change in each biochemical measure at baseline and intervention groups. Data with  $p < 0.05$  are significant. TBIL, total bilirubin; DBIL, direct bilirubin; IBIL, indirect bilirubin; TP, total protein; ALB, albumin; GLB, globulin; A/G, the ratio of albumin to globulin; PA, prealbumin; ALT, alanine aminotransferase; AST, aspartate amino transferase; ALP, alkaline phosphatase; GGT,  $\gamma$ -gultamyltransferase; TBA, total bile acid; CHE, cholinesterase; BUN, urea nitrogen; UA, uric acid; CREA, creatinine. The reference value for TBIL, DBIL, IBIL, TP, ALB, GLB, A/G, PA, ALT, AST, ALP, TBA, CHE, BUN was 2.0-20.4, 0.0-7.0, 3.00-15.00, 62.0-85.0, 35.0-53.0, 20.00-35.00, 1.50-2.50, 10.00-40.00, 0-38, 0-38, 0.00-3.00, 40-150, 0.00-15.00, 4000-11000, 1.7-8.3, respectively.

**Supplementary Table 6** The distribution of the 6 random selected samples at different gradients.

| Category | Grade        | Sample number |     |     |      |      |      |
|----------|--------------|---------------|-----|-----|------|------|------|
|          |              | 1             | 2   | 3   | 4    | 5    | 6    |
| Blood Ni | Low level    |               | A80 |     |      |      |      |
|          | Medium level | A77           |     |     |      | A130 | A151 |
|          | High level   |               |     | A91 | A119 |      |      |
| Blood Cu | Low level    | A77           |     |     |      |      |      |
|          | Medium level |               | A80 |     |      | A130 |      |
|          | High level   |               |     | A91 | A119 |      | A151 |

**Supplementary Table 7** The basic characteristics of the 6 random selected samples.

| Sample Number | Heavy metals in blood ( $\mu\text{g/L}$ ) |          | Age (years) | Working time (years) |
|---------------|-------------------------------------------|----------|-------------|----------------------|
|               | Ni                                        | Cu       |             |                      |
| A77           | 3.245                                     | 989.167  | 43          | 25                   |
| A80           | 0.700                                     | 1047.321 | 34          | 12                   |
| A91           | 9.023                                     | 1350.667 | 33          | 12                   |
| A119          | 6.957                                     | 1504.500 | 46          | 25                   |
| A130          | 2.533                                     | 1102.500 | 44          | 25                   |
| A151          | 2.823                                     | 1614.500 | 53          | 28                   |

**Supplementary Table 8** Oxidative stress defense relevant KEGG modules in faeces of workers before and after 12 weeks of probiotic yogurt intervention. KEGG modules that significantly differed in abundance between the two groups were calculated using Wilcoxon rank-sum test after Benjamini-Hochberg adjustment.

| ID     | Description                                | Gene                           | Pathways                                                                                                                                                                                                                                                                                                                                                                                                                                                                                                                                      | Mean_baseline | Mean_intervention | p.value  | p.adjust(BH) |
|--------|--------------------------------------------|--------------------------------|-----------------------------------------------------------------------------------------------------------------------------------------------------------------------------------------------------------------------------------------------------------------------------------------------------------------------------------------------------------------------------------------------------------------------------------------------------------------------------------------------------------------------------------------------|---------------|-------------------|----------|--------------|
| K03781 | catalase<br>[EC:1.11.1.6]                  | katE,<br>CAT,<br>catB,<br>srpA | ko00380 Tryptophan metabolism; ko00630 Glyoxylate and dicarboxylate metabolism; ko01100 Metabolic pathways; ko01110 Biosynthesis of secondary metabolites; ko01130 Biosynthesis of antibiotics; ko01200 Carbon metabolism; ko04011 MAPK signaling pathway-yeast; ko04016 MAPK signaling pathway-plant; ko04068 FoxO signaling pathway; ko04146 Peroxisome;ko04211 Longevity regulating pathway; ko04212 Longevity regulating pathway-worm; ko04213 Longevity regulating pathway-multiple species; ko05014 Amyotrophic lateral sclerosis (ALS) | 42.22119167   | 48.18196017       | 0.588745 | 0.806805     |
| K00432 | glutathione<br>peroxidase<br>[EC:1.11.1.9] | gpx,<br>btuE,<br>bsaA          | ko00480 Glutathione metabolism; ko00590 Arachidonic acid metabolism; ko01100 Metabolic pathways; ko04918 Thyroid hormone synthesis                                                                                                                                                                                                                                                                                                                                                                                                            | 47.438582     | 70.37770867       | 0.309524 | 0.686271     |

---

|        |                                                  |             |                                                                                                                                                                                                                                |             |             |          |          |
|--------|--------------------------------------------------|-------------|--------------------------------------------------------------------------------------------------------------------------------------------------------------------------------------------------------------------------------|-------------|-------------|----------|----------|
| K00383 | glutathione reductase (NADPH) [EC:1.8.1.7]       | GSR, gor    | ko00480 Glutathione metabolism; ko01100 Metabolic pathways; ko04918 Thyroid hormone synthesis                                                                                                                                  | 68.15360117 | 111.1892782 | 0.24026  | 0.625488 |
| K16015 | oxidoreductase [EC:1.1.1.-]                      | rifL, asm44 | ko01051 Biosynthesis of ansamycins; ko01130 Biosynthesis of antibiotics                                                                                                                                                        | 0.021367333 | 0.407070167 | 0.599266 | 0.815575 |
| K04565 | superoxide dismutase, Cu-Zn family [EC:1.15.1.1] | SOD1        | ko04146 Peroxisome; ko04213 Longevity regulating pathway - multiple species; ko05014 Amyotrophic lateral sclerosis (ALS); ko05016 Huntington disease; ko05020 Prion diseases                                                   | 4.2935735   | 14.54515067 | 0.041126 | 0.389241 |
| K04564 | superoxide dismutase, Fe-Mn family [EC:1.15.1.1] | SOD2        | ko04013 MAPK signaling pathway-fly; ko04068 FoxO signaling pathway; ko04146 Peroxisome; ko04211 Longevity regulating pathway; ko04212 Longevity regulating pathway worm; ko04213 Longevity regulating pathway-multiple species | 65.32628383 | 110.2628747 | 0.041126 | 0.389241 |

---

**Supplementary Table 9** Differential metabolites in feces of workers at baseline and after 12 weeks of probiotic yogurt intervention. The differential faecal metabolites between the two groups were identified using Student's t-test.

| <b>ID</b> | <b>MS2 name</b>                   | <b>Mean_baseline</b> | <b>Mean_intervention</b> | <b>VIP</b> | <b>p-value</b> | <b>q-value</b> | <b>Log_FC</b> |
|-----------|-----------------------------------|----------------------|--------------------------|------------|----------------|----------------|---------------|
| 35        | Piperidine                        | 0.00089187           | 2.9255E-05               | 1.94648966 | 0.01107365     | 0.13874672     | 4.930073107   |
| 142       | 4-aminobutyric acid               | 0.00026311           | 7.813E-05                | 1.46156385 | 0.03354137     | 0.1620275      | 1.751731891   |
| 144       | Y-Aminobutyric acid (GABA)        | 0.00250005           | 0.0007187                | 1.52330548 | 0.02906448     | 0.15892217     | 1.798496949   |
| 152       | Choline                           | 0.000418             | 0.00015832               | 1.7520613  | 0.00233431     | 0.10345109     | 1.400660522   |
| 290       | Taurine                           | 0.00052744           | 3.3149E-05               | 1.96384812 | 0.00040262     | 0.05196703     | 3.991974434   |
| 355       | Creatine                          | 0.00652739           | 0.00055076               | 1.67652616 | 0.03649236     | 0.16393824     | 3.567019069   |
| 726       | N-Acetyl-L-aspartic acid          | 0.00020073           | 7.9557E-05               | 1.47967159 | 0.01036731     | 0.13760357     | 1.33518674    |
| 727       | N-Acetyl-DL-aspartic acid         | 0.00023305           | 9.3598E-05               | 1.42186754 | 0.04599342     | 0.17084305     | 1.316056461   |
| 834       | N-(5-acetamidopentyl)acetamide    | 0.00077649           | 3.1682E-05               | 1.89065562 | 0.03173694     | 0.16075089     | 4.61522961    |
| 969       | N3,N4-Dimethyl-L-arginine         | 0.00014307           | 7.4381E-05               | 1.38523103 | 0.0140999      | 0.1433718      | 0.943771345   |
| 1131      | N-Acetyl- $\alpha$ -D-glucosamine | 0.00269578           | 0.00083821               | 1.67429708 | 0.01581976     | 0.14533962     | 1.685315784   |
| 1374      | 2'-Deoxyadenosine                 | 9.4754E-05           | 3.5368E-05               | 1.61176011 | 0.03443687     | 0.16263706     | 1.421729242   |
| 1531      | Apigenin                          | 3.5333E-05           | 1.8514E-06               | 1.82599217 | 0.01697114     | 0.14645767     | 4.254284094   |
| 1708      | Catechin                          | 2.7801E-05           | 1.1086E-06               | 1.95356168 | 0.04868829     | 0.17253734     | 4.648343176   |
| 1807      | Sphingosine (d18:1)               | 0.00023045           | 5.7003E-05               | 1.38038774 | 0.04698302     | 0.17148387     | 2.015323079   |
| 1920      | Heptadecanoyl Ethanolamide        | 7.1866E-05           | 1.1457E-05               | 1.43521749 | 0.030785       | 0.16013122     | 2.649119878   |

|      |                                                |            |            |            |            |            |             |
|------|------------------------------------------------|------------|------------|------------|------------|------------|-------------|
| 1954 | 2-Amino-1,3,4-octadecanetriol                  | 5.7294E-05 | 3.6102E-05 | 1.60375862 | 0.00458345 | 0.11831785 | 0.666289777 |
| 1985 | alpha-Linolenoyl Ethanolamide                  | 0.0002876  | 6.4197E-05 | 1.53933949 | 0.02867503 | 0.15863111 | 2.163510702 |
| 1998 | Linoleoyl Ethanolamide                         | 0.00762935 | 0.00190668 | 1.55095276 | 0.01670286 | 0.14620946 | 2.000495422 |
| 2350 | 3 $\alpha$ -Hydroxy-12 Ketolithocholic Acid    | 0.0003272  | 7.5842E-05 | 1.57439561 | 0.0382835  | 0.1649728  | 2.109114826 |
| 2393 | Palmitoylcarnitine                             | 0.00034962 | 0.00016058 | 1.52440275 | 0.01692495 | 0.14641543 | 1.122461728 |
| 2549 | Andrastin D                                    | 0.00028161 | 1.1348E-05 | 1.90421231 | 0.02448163 | 0.15500221 | 4.633172337 |
| 2769 | PC (16:0/0:0)                                  | 0.00172581 | 0.00042462 | 1.74100764 | 0.0134879  | 0.14256618 | 2.023015002 |
| 2910 | Bilirubin                                      | 0.00011606 | 1.7011E-05 | 1.65909391 | 0.01693569 | 0.14642527 | 2.770379804 |
| 202  | citramalate                                    | 0.00025526 | 5.5939E-05 | 1.84854269 | 0.00840446 | 0.08372178 | 2.190044666 |
| 217  | Ribose                                         | 0.00164088 | 0.00072447 | 1.7722071  | 0.00021327 | 0.02456745 | 1.179482146 |
| 247  | Gentisic acid                                  | 0.00020877 | 6.9034E-05 | 1.41806225 | 0.01341094 | 0.0950455  | 1.596501965 |
| 308  | 3-Hydroxy-3-methylglutaric acid                | 0.00049954 | 5.7374E-05 | 1.62178402 | 0.02891579 | 0.11429537 | 3.122140237 |
| 323  | 1,5-Anhydro-D-glucitol                         | 0.00027658 | 0.00011372 | 1.48273768 | 0.00866801 | 0.08437272 | 1.282147883 |
| 341  | 3-Phenyllactic acid                            | 2.3133E-05 | 4.9222E-06 | 1.6275785  | 0.04462692 | 0.12287851 | 2.232577376 |
| 456  | Glucose                                        | 0.0135564  | 0.00584183 | 1.32965171 | 0.00908524 | 0.08547656 | 1.214482374 |
| 572  | 1H-2-benzopyran-1-one, 6,8-dihydroxy-3-methyl- | 1.7963E-05 | 1.2944E-06 | 1.59211782 | 0.02697198 | 0.11268411 | 3.794622669 |
| 579  | D-Glucuronic Acid                              | 0.00325739 | 0.0010311  | 1.49174958 | 0.01741064 | 0.10107813 | 1.659531928 |
| 853  | Ethyl-beta-glucuronide                         | 0.00063929 | 0.00038225 | 1.36829588 | 0.02351766 | 0.1093169  | 0.74196871  |
| 873  | Sinapinic acid                                 | 1.7937E-05 | 3.5441E-06 | 1.45679391 | 0.0493069  | 0.12451191 | 2.339398857 |
| 1156 | N-Acetyltryptophan                             | 5.2171E-05 | 1.4879E-05 | 1.27422518 | 0.0255006  | 0.11133693 | 1.809920947 |

|      |                                                  |            |            |            |            |            |             |
|------|--------------------------------------------------|------------|------------|------------|------------|------------|-------------|
| 1428 | Inosine                                          | 7.7257E-05 | 3.5386E-05 | 1.27713744 | 0.03534798 | 0.11857644 | 1.12650434  |
| 1452 | Genistein                                        | 0.00022442 | 1.5543E-05 | 1.72456428 | 0.02796978 | 0.11353348 | 3.851883201 |
| 1523 | Phloretin                                        | 3.7151E-05 | 7.6079E-06 | 1.29721216 | 0.02171855 | 0.10724409 | 2.287848386 |
| 1712 | Catechin                                         | 0.0001354  | 3.9583E-05 | 1.14035913 | 0.0107378  | 0.08949917 | 1.774272363 |
| 1921 | Arachidonic acid                                 | 0.00335861 | 0.00196016 | 1.12319766 | 0.04389423 | 0.12259567 | 0.776889839 |
| 1932 | Epigallocatechin                                 | 8.6871E-05 | 1.0223E-05 | 1.50345137 | 0.01450798 | 0.09689427 | 3.087027089 |
| 1974 | N-Acetylneuraminic acid                          | 0.00146891 | 0.00053814 | 1.3482636  | 0.00952099 | 0.08663452 | 1.448695892 |
| 2090 | zearalenone                                      | 4.5058E-05 | 1.6487E-05 | 1.0763694  | 0.03910731 | 0.12052735 | 1.450476985 |
| 2134 | 20-Hydroxy-(5Z,8Z,11Z,14Z)-eicosatetraenoic acid | 9.6319E-05 | 6.5077E-06 | 1.71576807 | 0.03186658 | 0.11643453 | 3.887603857 |
| 2217 | 3-Hydroxy-3',4',5'-trimethoxyflavone             | 4.9703E-05 | 3.115E-06  | 1.6714844  | 0.04191748 | 0.12179047 | 3.996019597 |
| 2737 | Testosterone sulfate                             | 0.00103402 | 0.0004353  | 1.00928958 | 0.01438044 | 0.09669036 | 1.248177687 |
| 3054 | Deoxycholic Acid                                 | 0.01949122 | 0.00078415 | 1.75337112 | 0.0367521  | 0.1193442  | 4.635545937 |
| 3203 | 3-Dehydrocholic acid                             | 0.00018367 | 2.3906E-05 | 1.63898941 | 0.01433192 | 0.09661207 | 2.941638382 |
| 3227 | Cholic acid                                      | 0.03312883 | 0.00101466 | 1.82218202 | 0.02507126 | 0.11092064 | 5.029020071 |
| 3228 | Cholic acid                                      | 0.00553497 | 0.00045292 | 1.7372343  | 0.00753523 | 0.08134087 | 3.611259203 |
| 3234 | $\alpha$ -Muricholic Acid                        | 6.7462E-05 | 2.9699E-05 | 1.452389   | 0.02045938 | 0.10563269 | 1.183680911 |
| 3373 | Otenzepad                                        | 1.663E-05  | 3.365E-07  | 1.87512401 | 0.02768331 | 0.11329461 | 5.627063196 |
| 3478 | Vitexin                                          | 2.8047E-05 | 1.1138E-06 | 1.86190316 | 0.04931418 | 0.12451424 | 4.654296477 |
| 3782 | Andrastin C                                      | 3.1654E-05 | 1.1972E-05 | 1.22514736 | 0.03050884 | 0.11549188 | 1.402758978 |
| 4454 | Cochlioquinone A                                 | 5.9915E-05 | 1.9795E-05 | 1.30462356 | 0.02546592 | 0.11130371 | 1.597806238 |

|      |                                                          |            |            |            |            |            |             |
|------|----------------------------------------------------------|------------|------------|------------|------------|------------|-------------|
| 4762 | Biliverdin                                               | 3.7422E-05 | 1.4939E-05 | 1.79834827 | 0.00510119 | 0.0726009  | 1.324799647 |
| 4772 | Bilirubin                                                | 0.0002143  | 3.4917E-05 | 1.44182075 | 0.04241427 | 0.12199888 | 2.61759665  |
| 5129 | L-alpha-Phosphatidylethanolamine (Soy)                   | 0.00085761 | 0.00027474 | 1.42710889 | 0.03594611 | 0.1189096  | 1.642246641 |
| 2292 | (-)-Riboflavin                                           | 2.6029E-05 | 4.0565E-05 | 1.39025869 | 0.02637849 | 0.15676565 | -0.64011479 |
| 1853 | (R)-2-hydroxystearic acid                                | 0.01503862 | 0.04909464 | 1.74704473 | 0.0304665  | 0.11546138 | -1.70689358 |
| 542  | 10-Hydroxydecanoic acid                                  | 1.0001E-05 | 3.0089E-05 | 1.41097629 | 0.02248512 | 0.10815804 | -1.58911751 |
| 1843 | 13,14-Dihydro-15-keto-tetranor prostaglandin F1 $\alpha$ | 3.2268E-06 | 4.9868E-05 | 1.92207103 | 0.00584577 | 0.07535281 | -3.94995762 |
| 2810 | 19(R)-hydroxy Prostaglandin F1 $\alpha$                  | 1.3317E-05 | 2.5406E-05 | 1.23884224 | 0.04683077 | 0.12368297 | -0.93197962 |
| 1297 | 2',4',6'-Trihydroxydihydrochalcone                       | 2.7946E-07 | 5.389E-05  | 1.48247535 | 0.04606057 | 0.1234094  | -7.59124145 |
| 649  | 4-Phenylbutyric acid                                     | 1.2749E-05 | 4.0928E-05 | 1.55454645 | 0.03602902 | 0.16365614 | -1.68269368 |
| 893  | 5-Hydroxyindole-3-acetic acid                            | 8.2796E-05 | 0.00068956 | 1.50668259 | 0.04276858 | 0.16858777 | -3.05804147 |
| 470  | 8-Hydroxyquinoline                                       | 1.0224E-05 | 0.00010488 | 1.52722621 | 0.04274269 | 0.16856855 | -3.35870729 |
| 1128 | beta-Hydroxymyristic acid                                | 2.2416E-05 | 6.7562E-05 | 1.42597656 | 0.04242033 | 0.12200139 | -1.5917066  |
| 414  | Citrulline                                               | 0.00024806 | 0.00049895 | 1.44087786 | 0.01572795 | 0.09871502 | -1.00821627 |
| 228  | D-(+)-Proline                                            | 0.00152817 | 0.00404606 | 1.67847936 | 0.02087736 | 0.15092625 | -1.40471169 |
| 321  | D-(+)-Pyroglutamic Acid                                  | 0.00127907 | 0.00238483 | 1.50832657 | 0.00629074 | 0.12697506 | -0.89879091 |
| 2462 | delta4-Dafachronic acid                                  | 5.1637E-06 | 5.0063E-05 | 1.72859262 | 0.04262688 | 0.16848233 | -3.27727971 |
| 819  | Ecgonine                                                 | 5.3314E-05 | 0.00011239 | 1.58375458 | 0.00774301 | 0.13183213 | -1.07591538 |
| 1808 | Enterolactone                                            | 0.00034342 | 0.0032169  | 1.52884261 | 0.02953879 | 0.11477566 | -3.22763657 |
| 1284 | Ethyl myristate                                          | 0.00369079 | 0.00632754 | 1.14019727 | 0.03489347 | 0.11831694 | -0.77771608 |



|      |                             |            |            |            |            |            |             |
|------|-----------------------------|------------|------------|------------|------------|------------|-------------|
| 719  | Gly-Val                     | 0.00012701 | 0.00020458 | 1.48140105 | 0.04318714 | 0.16889596 | -0.68777792 |
| 237  | Indole                      | 2.1896E-05 | 0.00010715 | 1.55855733 | 0.02432056 | 0.15484179 | -2.29095528 |
| 511  | L(-)-Methionine             | 0.00096289 | 0.00171406 | 1.6030135  | 0.04282041 | 0.1686262  | -0.83198131 |
| 328  | L(-)-Pipicolinic acid       | 0.00012387 | 0.00074228 | 1.83802615 | 0.03053059 | 0.15995992 | -2.58320058 |
| 732  | L-(+)-Citrulline            | 0.00078326 | 0.00153464 | 1.75832511 | 0.00309746 | 0.11041711 | -0.9703423  |
| 364  | L(+)-Ornithine              | 0.00149864 | 0.00387479 | 1.57018906 | 0.02388088 | 0.15439464 | -1.37046342 |
| 693  | Levetiracetam               | 7.9385E-05 | 0.00012817 | 1.60120759 | 0.0107436  | 0.13822893 | -0.69111283 |
| 494  | L-Glutamic acid             | 0.00441469 | 0.01051381 | 1.36747773 | 0.01262982 | 0.14132317 | -1.25190058 |
| 358  | L-Isoleucine                | 0.0036735  | 0.00781582 | 1.84773736 | 0.00885648 | 0.13463682 | -1.08924182 |
| 2859 | Lithocholic Acid            | 0.01125048 | 0.03587107 | 1.54542624 | 0.00187539 | 0.05244701 | -1.67283413 |
| 357  | L-Norleucine                | 0.00985051 | 0.01799182 | 1.70884612 | 0.02409493 | 0.15461404 | -0.86907041 |
| 779  | L-Tyrosine                  | 0.00170198 | 0.00285989 | 1.62816913 | 0.02251635 | 0.15291436 | -0.74874269 |
| 2722 | Nervonic acid               | 0.00012499 | 0.00032457 | 1.15128395 | 0.03815016 | 0.12006136 | -1.37668479 |
| 272  | N-Tigloylglycine            | 1.0862E-05 | 6.5009E-05 | 1.43796044 | 0.04736253 | 0.12386734 | -2.58133266 |
| 1607 | Oleic acid                  | 0.01068824 | 0.03338731 | 1.72839907 | 0.01914973 | 0.10379306 | -1.64327606 |
| 532  | Oxypurinol                  | 0.00011384 | 0.00019345 | 1.23599703 | 0.04005175 | 0.16646185 | -0.76503463 |
| 2847 | Riboflavin                  | 5.6448E-05 | 8.4911E-05 | 1.33542408 | 0.04795604 | 0.12406891 | -0.58901458 |
| 299  | Thymine                     | 4.7804E-05 | 0.00039556 | 1.87836296 | 0.02566316 | 0.15612665 | -3.04870133 |
| 1442 | trans-10-Heptadecenoic Acid | 0.00046343 | 0.00128682 | 1.17086585 | 0.0352624  | 0.118528   | -1.47339344 |
| 202  | Uracil                      | 0.00010901 | 0.00022965 | 1.62698919 | 0.00142261 | 0.08895675 | -1.07503799 |

---

|      |                          |            |            |            |            |            |             |
|------|--------------------------|------------|------------|------------|------------|------------|-------------|
| 421  | Urocanic acid            | 7.1287E-05 | 0.00022085 | 1.77706763 | 0.02716849 | 0.15743785 | -1.63133182 |
| 530  | Xanthine                 | 0.0003712  | 0.00061903 | 1.25686694 | 0.03094868 | 0.16024014 | -0.73779387 |
| 1572 | $\alpha$ -Linolenic Acid | 0.00079199 | 0.00260225 | 1.49376968 | 0.00434549 | 0.06944626 | -1.71621557 |

---

**Supplementary Table 10** Differential metabolites in serum of workers at baseline and after 12 weeks of probiotic yogurt intervention. The differential serum metabolites between the two groups were identified using Student's t-test

| <b>ID</b> | <b>MS2 name</b>                        | <b>Mean_baseline</b> | <b>Mean_intervention</b> | <b>VIP</b> | <b>p-value</b> | <b>q-value</b> | <b>Log_FC</b> |
|-----------|----------------------------------------|----------------------|--------------------------|------------|----------------|----------------|---------------|
| 920       | (+/-)13-HODE                           | 0.00011502           | 5.8799E-05               | 1.52059933 | 0.02323464     | 0.06020311     | 0.9679836     |
| 1086      | (±)11(12)-EET                          | 0.00173107           | 0.00037872               | 1.95401506 | 7.6335E-05     | 0.00248948     | 2.19247814    |
| 963       | (R)-2-hydroxystearic acid              | 0.00054034           | 0.00028179               | 1.9762567  | 3.4757E-06     | 0.00073171     | 0.9392459     |
| 1005      | 11(Z),14(Z)-Eicosadienoic acid         | 0.00069242           | 0.00025529               | 1.86000562 | 2.0893E-05     | 0.00135803     | 1.43949893    |
| 791       | 16-Hydroxyhexadecanoic acid            | 6.3768E-05           | 4.0405E-05               | 1.6046485  | 0.00328854     | 0.01872285     | 0.65830381    |
| 1121      | 2-Amino-1,3,4-octadecanetriol          | 0.00112091           | 0.00028864               | 1.64511831 | 0.03527412     | 0.09933197     | 1.95734901    |
| 346       | 2-Hydroxyhippuric acid                 | 0.00011771           | 2.8676E-05               | 1.72867913 | 0.03153293     | 0.07177659     | 2.03729534    |
| 998       | 8Z,11Z,14Z-Eicosatrienoic acid         | 0.00124741           | 0.00038618               | 1.9297752  | 9.6E-06        | 0.00102351     | 1.69156871    |
| 1037      | Arachidic Acid                         | 7.8773E-05           | 6.0422E-05               | 1.379748   | 0.01970766     | 0.054439       | 0.38262016    |
| 985       | Arachidonic acid                       | 0.01136322           | 0.0059108                | 1.70075433 | 0.00176198     | 0.01381423     | 0.94294665    |
| 1586      | Calcitriol                             | 3.7702E-05           | 2.5882E-05               | 1.37697328 | 0.01877567     | 0.0530823      | 0.54268868    |
| 106       | Choline                                | 0.00997761           | 0.00620133               | 1.89911289 | 9.8694E-05     | 0.00234909     | 0.6861162     |
| 977       | cis-5,8,11,14,17-Eicosapentaenoic acid | 0.00108926           | 0.00041244               | 1.39667154 | 0.01815569     | 0.05214394     | 1.40110483    |
| 490       | Cotinine                               | 0.00035184           | 4.8957E-06               | 1.87648653 | 0.0261385      | 0.08447696     | 6.16724402    |
| 207       | D-(+)-Pipicolinic acid                 | 0.00053953           | 0.00031536               | 1.36820104 | 0.01596321     | 0.06360348     | 0.77470282    |
| 1457      | Deoxycholic Acid                       | 0.00058905           | 0.00029937               | 1.14001042 | 0.03970194     | 0.08184039     | 0.97648851    |

|      |                                   |            |            |            |            |            |            |
|------|-----------------------------------|------------|------------|------------|------------|------------|------------|
| 1247 | D-Erythro-sphingosine 1-phosphate | 0.00021066 | 0.00015786 | 1.74908801 | 0.00128269 | 0.01216007 | 0.41626772 |
| 1068 | Dihydro-sphingosine               | 0.00064412 | 0.0005095  | 1.70909798 | 0.00230684 | 0.0172767  | 0.33823038 |
| 153  | DL-Mandelic acid                  | 2.4497E-05 | 1.3496E-05 | 1.40756364 | 0.01239257 | 0.04174985 | 0.86007222 |
| 1168 | Docosatetraenoic acid             | 0.00085565 | 0.00036519 | 1.70386393 | 0.00041967 | 0.00636068 | 1.22836899 |
| 697  | Ethyl myristate                   | 0.00134033 | 0.00069617 | 1.74399113 | 0.00122242 | 0.01117105 | 0.9450632  |
| 159  | Gentisic acid                     | 3.4077E-05 | 1.1388E-05 | 1.85253232 | 0.00798071 | 0.03137194 | 1.58129659 |
| 129  | Glutamic acid                     | 0.00056779 | 0.00034107 | 1.64725352 | 0.00191954 | 0.01445007 | 0.73527716 |
| 163  | Histidine                         | 0.00067677 | 0.00037899 | 1.36504744 | 0.01619266 | 0.04896605 | 0.8364983  |
| 221  | Homogentisate                     | 0.00048767 | 0.0001645  | 1.45397265 | 0.0102088  | 0.03680575 | 1.56778719 |
| 232  | L(+)-Ornithine                    | 0.00015597 | 0.00011047 | 1.51478131 | 0.00699685 | 0.03621479 | 0.49755192 |
| 347  | L-Glutamic acid                   | 0.00092138 | 0.00047402 | 1.95370389 | 3.621E-05  | 0.00110281 | 0.95885973 |
| 393  | L-Histidine                       | 0.00075577 | 2.6615E-05 | 1.94639589 | 0.02700777 | 0.08594741 | 4.82764154 |
| 835  | Linoleic acid                     | 0.02791307 | 0.01849807 | 1.38712343 | 0.04468776 | 0.08713187 | 0.59356574 |
| 204  | L-Pyroglutamic acid               | 0.00082986 | 0.00057995 | 1.86499102 | 0.00022752 | 0.00377143 | 0.51694129 |
| 528  | Myristic Acid                     | 0.00014014 | 7.478E-05  | 1.74766909 | 0.00208519 | 0.01506614 | 0.90610846 |
| 782  | N,N-Dimethyldodecylamine N-oxide  | 0.00016093 | 9.3739E-05 | 1.38497145 | 0.02980321 | 0.09081906 | 0.77973181 |
| 455  | Nigrosporapyrone D                | 0.00050948 | 0.00014209 | 1.61552235 | 0.01563089 | 0.06281171 | 1.84226628 |
| 64   | N-Methyl-2-pyrrolidone            | 0.08278719 | 0.07260576 | 1.41841118 | 0.02018403 | 0.07302546 | 0.18932354 |
| 850  | Oleic acid                        | 0.0312798  | 0.01793559 | 1.63251228 | 0.00373234 | 0.02019379 | 0.80240609 |
| 1142 | Oleoyl ethanolamide               | 2.1464E-05 | 1.324E-05  | 1.53379114 | 0.01923854 | 0.07095054 | 0.69704921 |

|      |                                    |            |            |            |            |            |             |
|------|------------------------------------|------------|------------|------------|------------|------------|-------------|
| 683  | Palmitoleic acid                   | 0.00138851 | 0.00059557 | 1.53503723 | 0.02635445 | 0.06491127 | 1.22119518  |
| 725  | Pantothenic acid                   | 3.1468E-05 | 1.6965E-05 | 1.61011523 | 0.01756801 | 0.06724556 | 0.89134779  |
| 1426 | PC(16:0/0:0)                       | 0.01011811 | 0.00668786 | 1.81751731 | 0.0002372  | 0.00384419 | 0.59732469  |
| 1752 | Phosphatidylethanolamine lyso 16:0 | 0.00114236 | 0.00061535 | 1.65487951 | 0.01305236 | 0.04311858 | 0.89253101  |
| 1902 | Phosphatidylethanolamine lyso 18:0 | 0.00161041 | 0.00106501 | 1.5463469  | 0.0055344  | 0.02528773 | 0.59655418  |
| 1997 | Phosphatidylethanolamine lyso 20:4 | 0.00016707 | 0.00013391 | 1.48689152 | 0.0100455  | 0.03640803 | 0.31917154  |
| 529  | Phosphocholine                     | 3.9002E-05 | 2.4113E-05 | 1.2954403  | 0.0370302  | 0.10180468 | 0.6937525   |
| 1055 | Sphingosine (d18:1)                | 0.00013536 | 4.1747E-05 | 2.06762792 | 3.3282E-05 | 0.00104255 | 1.69705462  |
| 1353 | Thromboxane B2                     | 5.9213E-05 | 4.8785E-06 | 2.00729714 | 0.00062855 | 0.00765856 | 3.60140309  |
| 454  | Uric acid                          | 0.00104459 | 0.00080253 | 1.23081307 | 0.03699351 | 0.1017542  | 0.38032192  |
| 1310 | Ursocolanic Acid                   | 2.8699E-05 | 1.3746E-05 | 1.75721954 | 0.00098013 | 0.00997261 | 1.06198852  |
| 824  | $\alpha$ -Linolenic Acid           | 0.00413907 | 0.00201419 | 1.50019059 | 0.00865415 | 0.03303686 | 1.03910492  |
| 100  | N,N-Dimethylglycine                | 0.00019811 | 0.00031376 | 1.71588783 | 0.00344424 | 0.02255168 | -0.66334797 |
| 103  | Choline                            | 0.00019818 | 0.00075198 | 2.02218993 | 1.1898E-06 | 0.00050698 | -1.92389829 |
| 168  | L-Valine                           | 0.00323546 | 0.0042786  | 1.27803451 | 0.04074843 | 0.10685293 | -0.40316545 |
| 176  | Threonine                          | 0.0004975  | 0.0007453  | 1.50902741 | 0.03009927 | 0.09131537 | -0.58313311 |
| 177  | Indoline                           | 7.4368E-06 | 2.5656E-05 | 1.72572447 | 0.0016926  | 0.0142321  | -1.7865365  |
| 287  | Hypoxanthine                       | 0.00078455 | 0.00116587 | 1.50034964 | 0.0419045  | 0.10866536 | -0.57147111 |
| 323  | DL-Stachydrine                     | 0.00015326 | 0.00039038 | 1.55628925 | 0.0061699  | 0.03355176 | -1.34888596 |
| 418  | L(-)-Carnitine                     | 0.0057199  | 0.00740708 | 1.61383771 | 0.00360026 | 0.02326267 | -0.37291631 |

|      |                                 |            |            |            |            |            |             |
|------|---------------------------------|------------|------------|------------|------------|------------|-------------|
| 438  | L-Methionine sulfoxide          | 0.00021999 | 0.00039543 | 1.77615331 | 0.00093441 | 0.01000301 | -0.84597471 |
| 480  | Gly-Val                         | 2.5952E-05 | 0.00032063 | 2.08895405 | 0.00052107 | 0.0066279  | -3.62697018 |
| 566  | Methyl indole-3-acetate         | 2.1714E-05 | 3.48E-05   | 1.29669779 | 0.02386411 | 0.08040364 | -0.68045264 |
| 633  | Diphenylsulfoxide               | 0.00118257 | 0.00188706 | 1.43277919 | 0.01734411 | 0.06675471 | -0.67421319 |
| 903  | Hexanoylcarnitine               | 1.7046E-05 | 3.7131E-05 | 1.75273311 | 0.00182196 | 0.01485971 | -1.12314886 |
| 919  | N-Phenylacetylglutamine         | 8.0016E-05 | 0.0002279  | 1.06182482 | 0.04490378 | 0.11318521 | -1.51003958 |
| 978  | $\alpha$ -Aspartylphenylalanine | 1.375E-05  | 8.8496E-05 | 1.86049828 | 0.0077634  | 0.03911087 | -2.68619537 |
| 1006 | Octanoyl-L-Carnitine            | 8.0769E-05 | 0.00019033 | 1.79799881 | 0.00102705 | 0.01061784 | -1.23661784 |
| 1112 | Decanoylcarnitine               | 0.00012416 | 0.00034241 | 1.82372623 | 0.00072123 | 0.00840764 | -1.46347309 |
| 1192 | Lauroylcarnitine                | 5.0077E-05 | 0.0001048  | 1.50834168 | 0.01049559 | 0.04859415 | -1.06543568 |
| 210  | raspberry ketone                | 2.2337E-05 | 4.8411E-05 | 1.80090448 | 0.00111181 | 0.01065569 | -1.11591752 |
| 241  | Gly-Val                         | 1.2642E-05 | 0.00016381 | 2.04493356 | 0.00034208 | 0.00576618 | -3.69572045 |
| 254  | N-Formyl-DL-methionine          | 2.9003E-05 | 3.9107E-05 | 1.50049182 | 0.02546013 | 0.06360991 | -0.4312306  |
| 349  | 2-Hydroxyhippuric acid          | 4.6116E-05 | 0.00019033 | 1.35664642 | 0.01579322 | 0.04827779 | -2.04515558 |
| 364  | (-)-Camphanic acid              | 3.393E-05  | 5.7041E-05 | 1.33862181 | 0.02582536 | 0.06414586 | -0.74947    |
| 378  | Lauric acid                     | 1.9159E-05 | 2.2713E-05 | 1.2351636  | 0.03671149 | 0.07836572 | -0.24554827 |
| 421  | Kynurenine                      | 3.6445E-05 | 4.6393E-05 | 1.29549251 | 0.03330667 | 0.0740962  | -0.34816903 |
| 830  | $\alpha$ -Aspartylphenylalanine | 2.5247E-05 | 0.0001352  | 1.80001342 | 0.00954379 | 0.03520232 | -2.42088845 |
| 960  | Tretinoin                       | 0.00023574 | 0.00036836 | 1.25481284 | 0.03997012 | 0.08214036 | -0.64395648 |
| 2659 | Levothyroxine                   | 1.555E-05  | 1.8537E-05 | 1.24489172 | 0.03312075 | 0.07385266 | -0.2535037  |

**Supplementary Table 11** List of specific primers used in this study.

| Bacteria             | Primer                                                           | Function                               | Reference                              |
|----------------------|------------------------------------------------------------------|----------------------------------------|----------------------------------------|
| <i>Pacidilactici</i> | F: 5'-GGACTTGATAACGTACCCGC-3'<br>R: 5'-GTTCCGTCTTGCATTTGACC-3'   | Specific primer<br>for GR-1            | (Mora, Fortina et al.<br>1997)         |
| Total bacteria       | F: 5'-GCAGGCCATACACATGCAAGTC-3'<br>R: 5'-CTGCTGCCTCCCGTAGGAGT-3' | Universal primer<br>for total bacteria | (Castillo, Martín-Orúe et<br>al. 2006) |
| V3&V4<br>region      | F: 5'- CCTACGGGNGGCWGCAG-3'<br>R: 5' -GACTACHVGGGTATCTAATCC-3'   | For 16S rRNA<br>gene sequencing        | (Klindworth, Pruesse et<br>al. 2012)   |

## SUPPLEMENTARY FIGURE

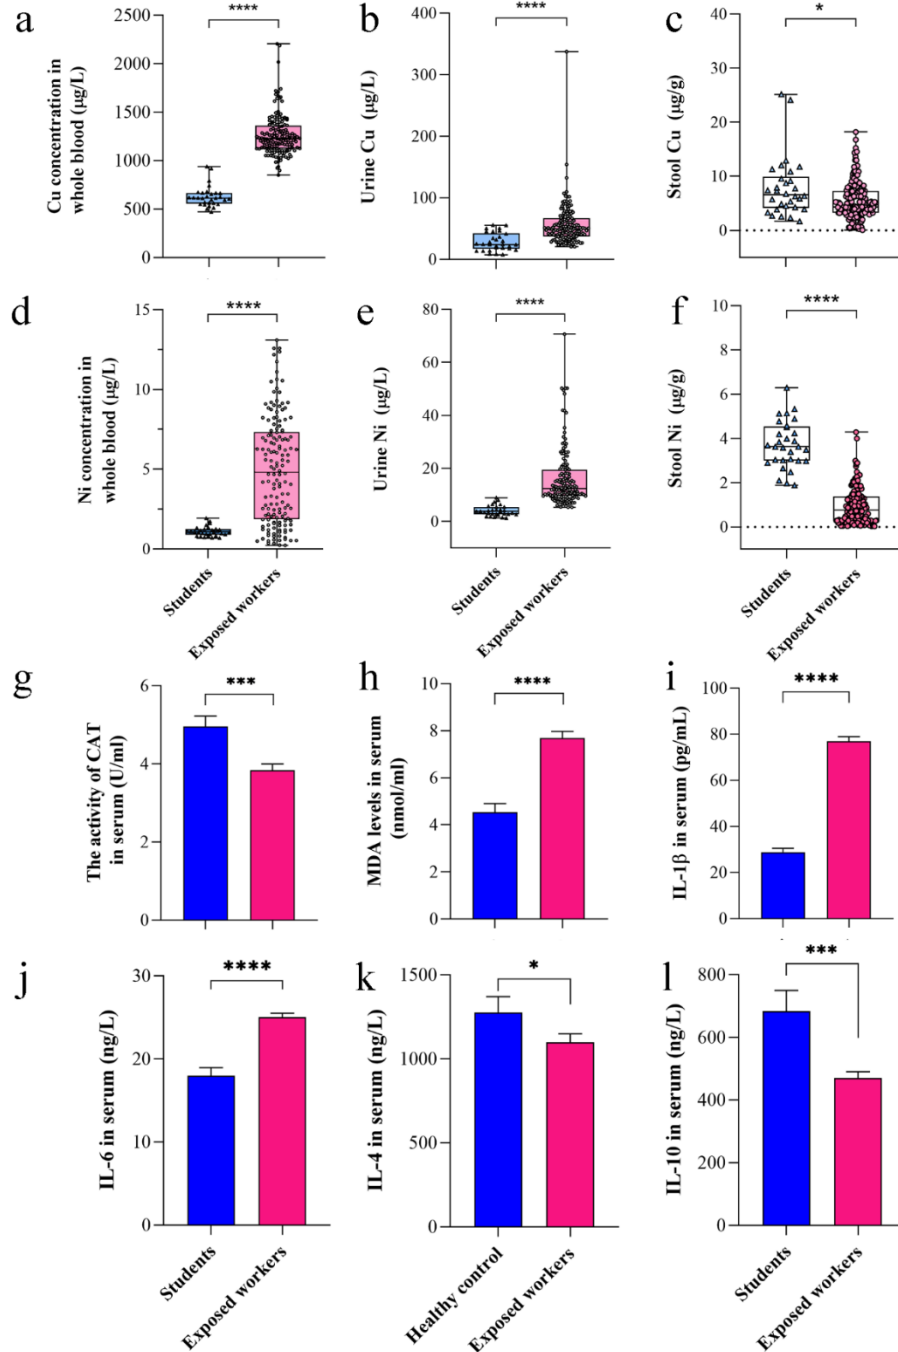

**Supplementary Figure 1. Boxplots of Cu and Ni levels in blood, urine and faeces of all participants at baseline. The concentration of Cu/Ni in whole blood (a, d), urine (b, e), and faeces (c, f) of students and exposed workers. Students, n=30; Exposed**



workers, n=152. **(g)** The activity of CAT, **(h)** MDA level, **(i)** IL-1 $\beta$ , **(j)** IL-6, **(k)** IL-4 and **(l)** IL-10 in serum of all participants at baseline. In the box plot, box limits represent 25 and 75 percentiles; line within box indicates median; the whisker ends the points minimum and maximum. Data are represented as mean $\pm$  SEM. Statistical significance was done by two-tailed Mann-Whitney test ( $*p < 0.05$ ,  $**p < 0.01$ ,  $***p < 0.001$ ,  $****p < 0.0001$ ) using the GraphPad Prism (version 8.0.1). Source data are provided as a Source Data file.

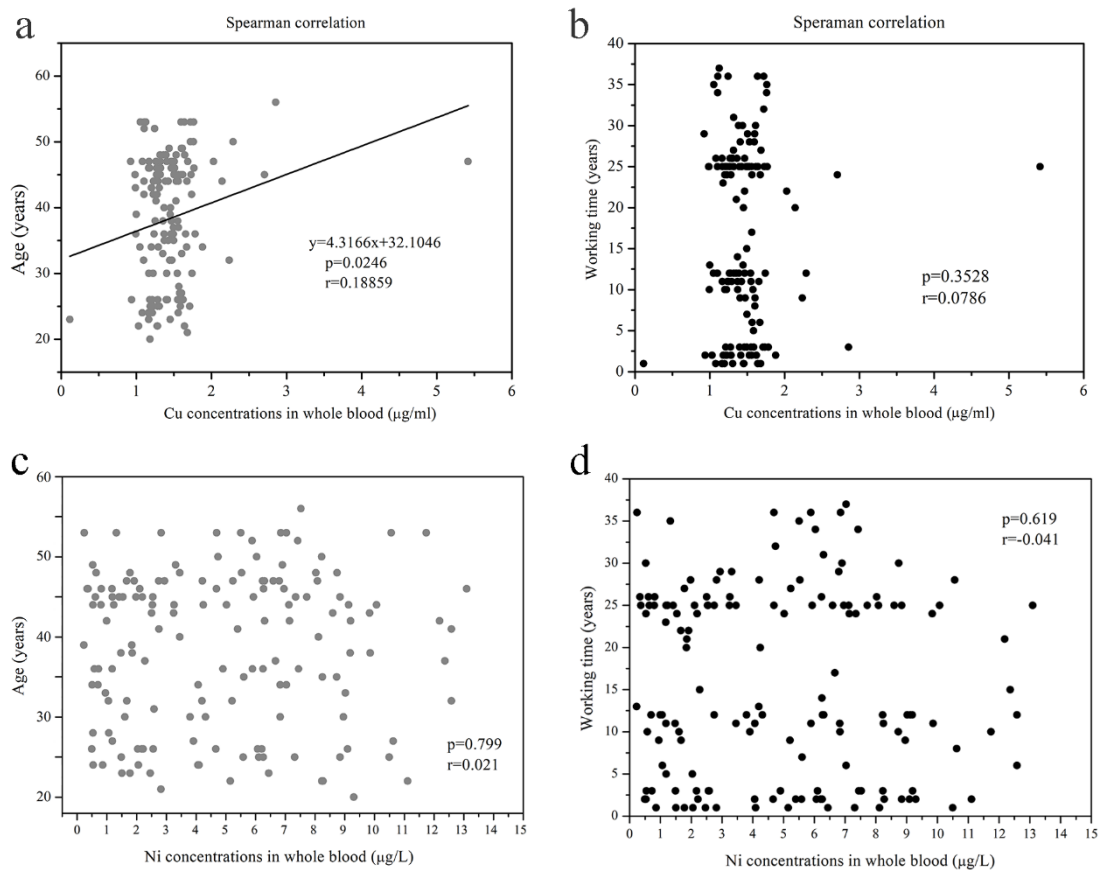

**Supplementary Figure 2.** Spearman's correlation of the Cu and Ni levels in blood with respect to age (**a, c**) and working time (**b, d**). Correlation analysis was conducted using SPSS 21 software and graphs were generated using Origin Pro 8.

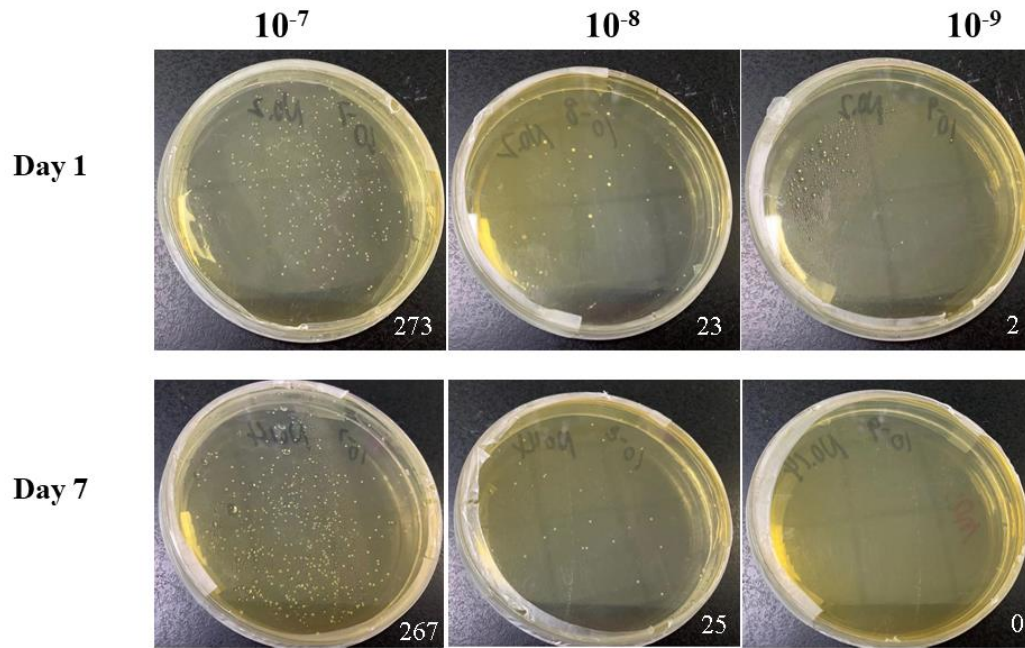

**Supplementary Figure 3.** Evaluation of viability of probiotic in yogurt within 7 days of storage at 4 °C. The viability of probiotic in 1 gram of yogurt was evaluated by pouring plate method in MRS solid medium at 37 °C for 72h.

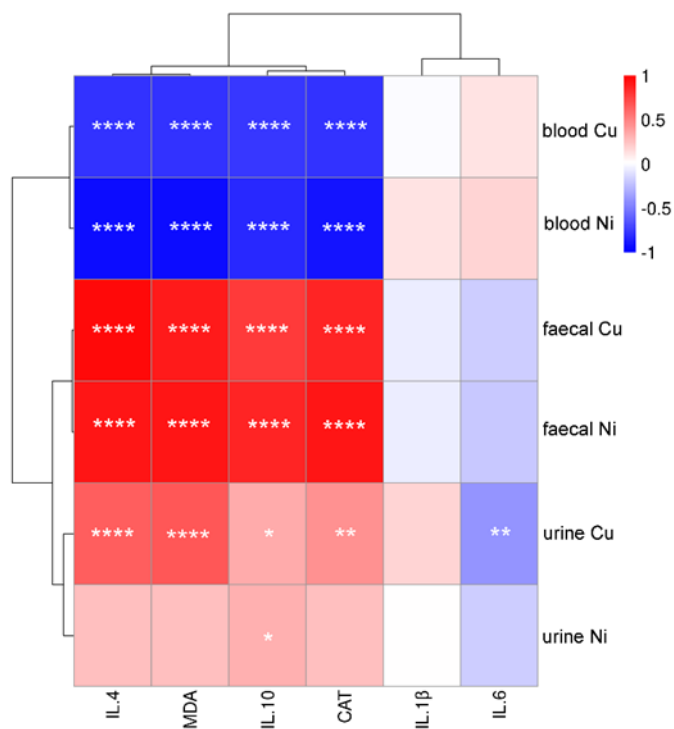

**Supplementary Figure 4.** Spearman's correlation analysis of the reduction of heavy metals load between the alteration of physiological parameters with probiotic yogurt administration. \* $p < 0.05$ , \*\* $p < 0.01$ , \*\*\*\* $p < 0.0001$ .

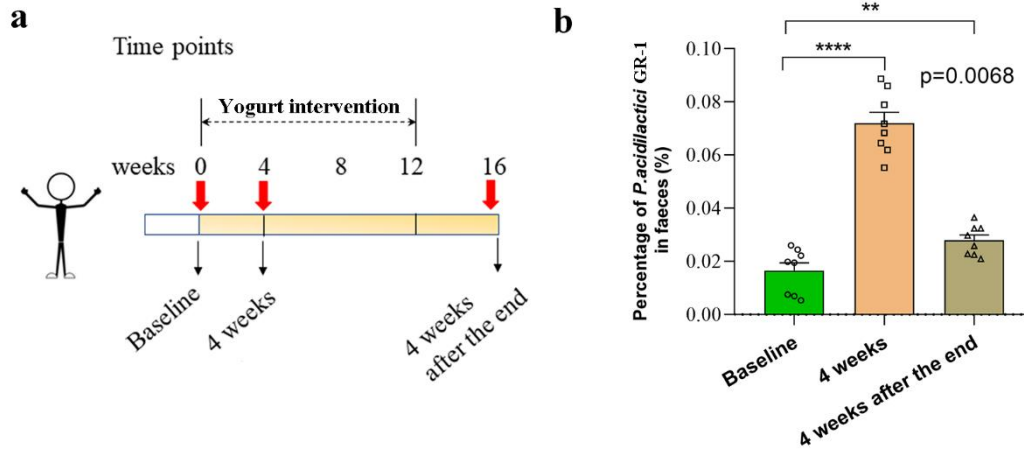

**Supplementary Figure 5. Probiotic GR-1 colonization in the intestine and concentration of SCFAs in the faeces of occupational workers after 12 weeks of probiotic yogurt intervention.** **a** Schematic illustration of the probiotic yogurt intervention to workers. Fecal samples were analyzed at baseline, 4 weeks after intervention, and 4 weeks after the end. **b** Changes in *Pediococcus acidilactici* load in feces throughout the experiment. The relative abundance of GR-1 is expressed as the ratio of the absolute copies of GR-1 to total bacteria (probiotic yogurt (n=8) vs. baseline (n=8)). Data are represented as mean± SEM. Statistical analysis was done by one-way ANOVA with Tukey's post-hoc analysis. Source data are provided as a Source Data file.

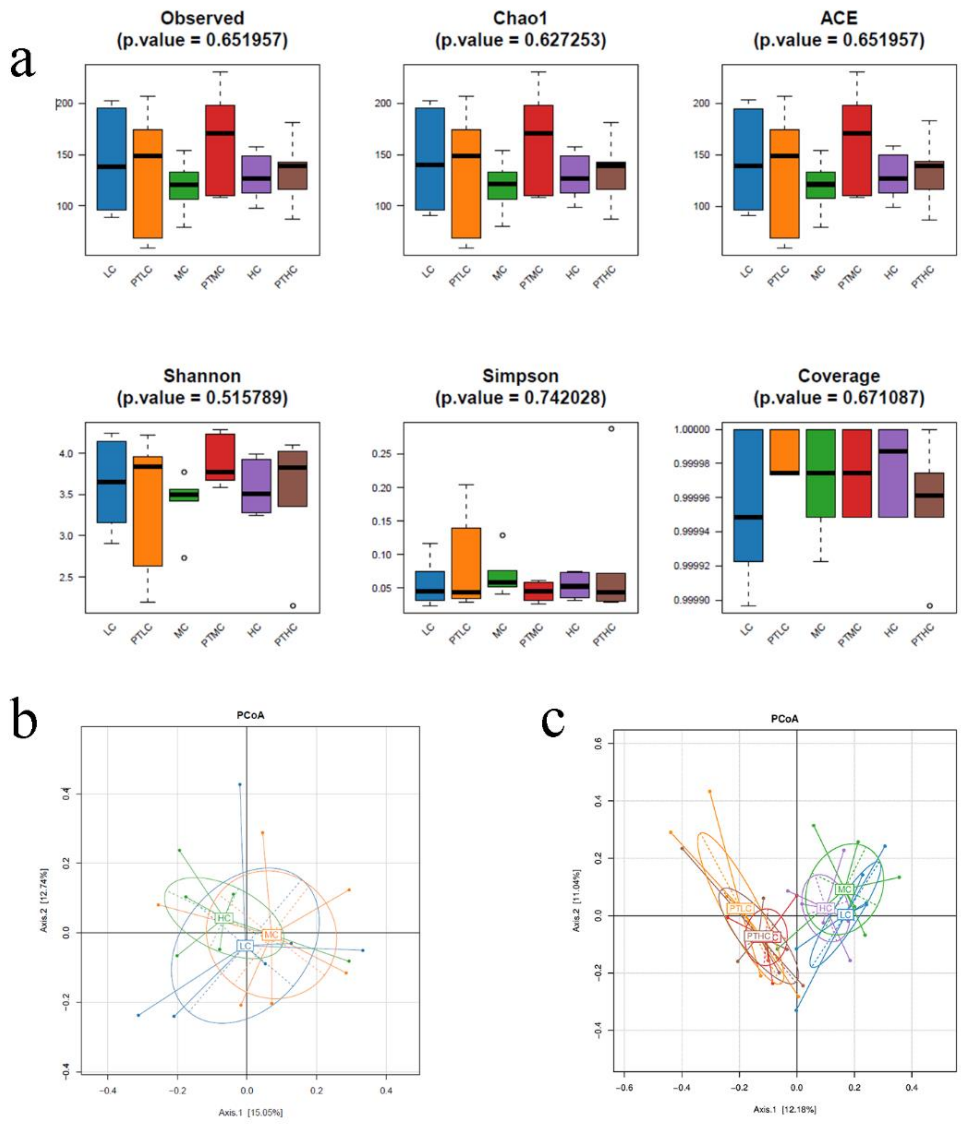

**Supplementary Figure 6. Effect of probiotic yogurt on the gut microbiome of workers using 16S rRNA gene sequencing. (a)** Alpha diversity (Observed, Chao1, ACE, Shannon, Simpson, and Coverage) of gut microbiota; Principal component ordination analysis (PCoA) of gut microbiota **(b and c)** among groups at baseline and at the end of the study (after 12 weeks of probiotic yogurt intervention) with low, medium and high levels of blood heavy metals. LC, low levels; MC, medium levels; HC, high levels; PTLC, low levels after 12 week of probiotic yogurt intervention; PTMC, medium levels after 12 week of probiotic yogurt intervention; and PTHC, high levels after 12 week of probiotic yogurt intervention. For a, box limits represent 25 and 75 percentiles; the line within the box indicates median; the whisker represents the minimum and maximum points. Alpha diversity estimates were calculated using Kruskal-Wallis test and PCoA plots were performed based on bray-Curtis distance of

ASVs.

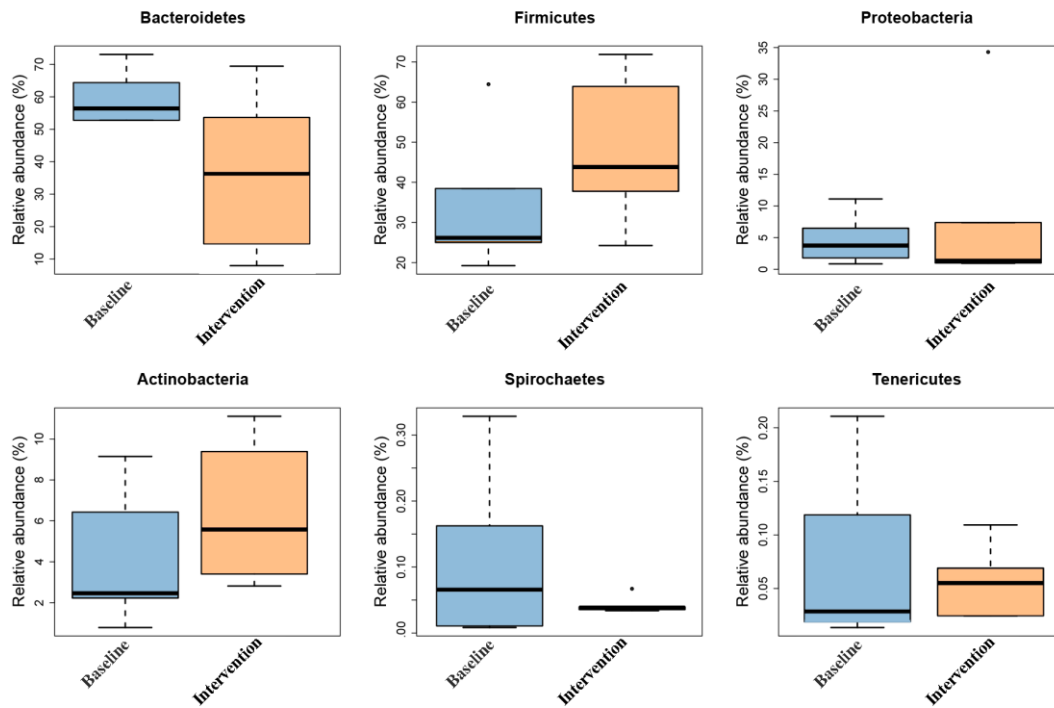

**Supplementary Figure 7.** Effect of probiotic yogurt on phylum level using metagenomic sequencing. Baseline and Intervention indicate gut microbiome of workers at the time of recruit and after 12 weeks of probiotic yogurt intervention, respectively. Box limits represent 25 and 75 percentiles; the line within the box indicates median; the whisker represents the minimum and maximum points. Statistical analysis of phylum was performed using Metastats test.

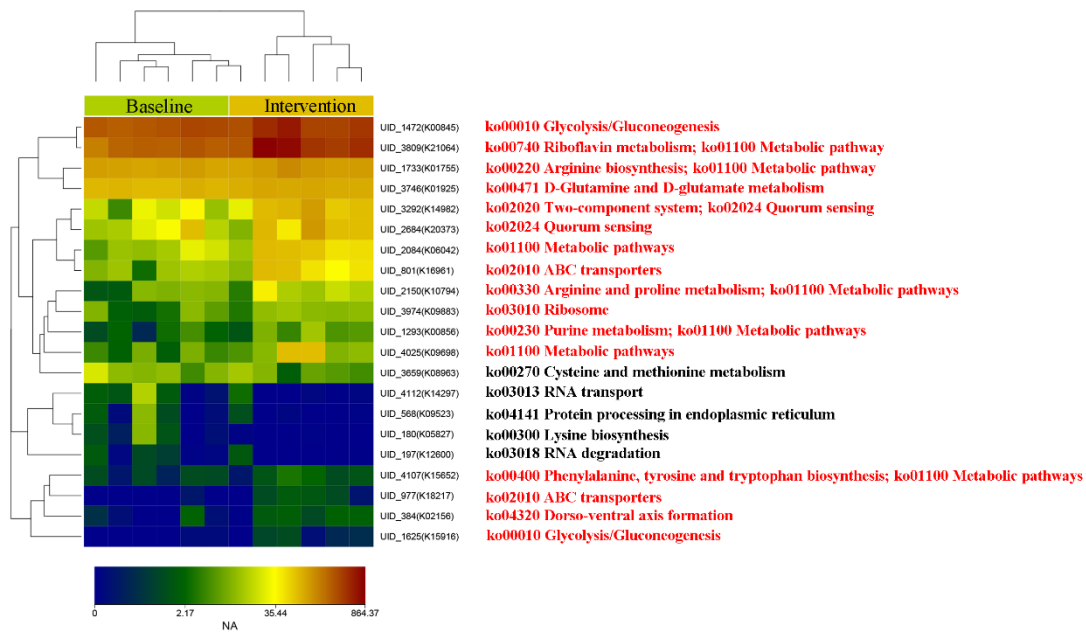

**Supplementary Figure 8.** Heatmap of KEGG pathway enrichment analysis for intervention versus baseline group. Red text indicates pathway enrichment in the intervention group, and black text represents pathway enrichment in the baseline group. KEGG pathway that significantly differed in abundance between the two groups were calculated using Wilcoxon rank-sum test after Benjamini-Hochberg adjustment. In the heatmap, red represents significant enrichment.



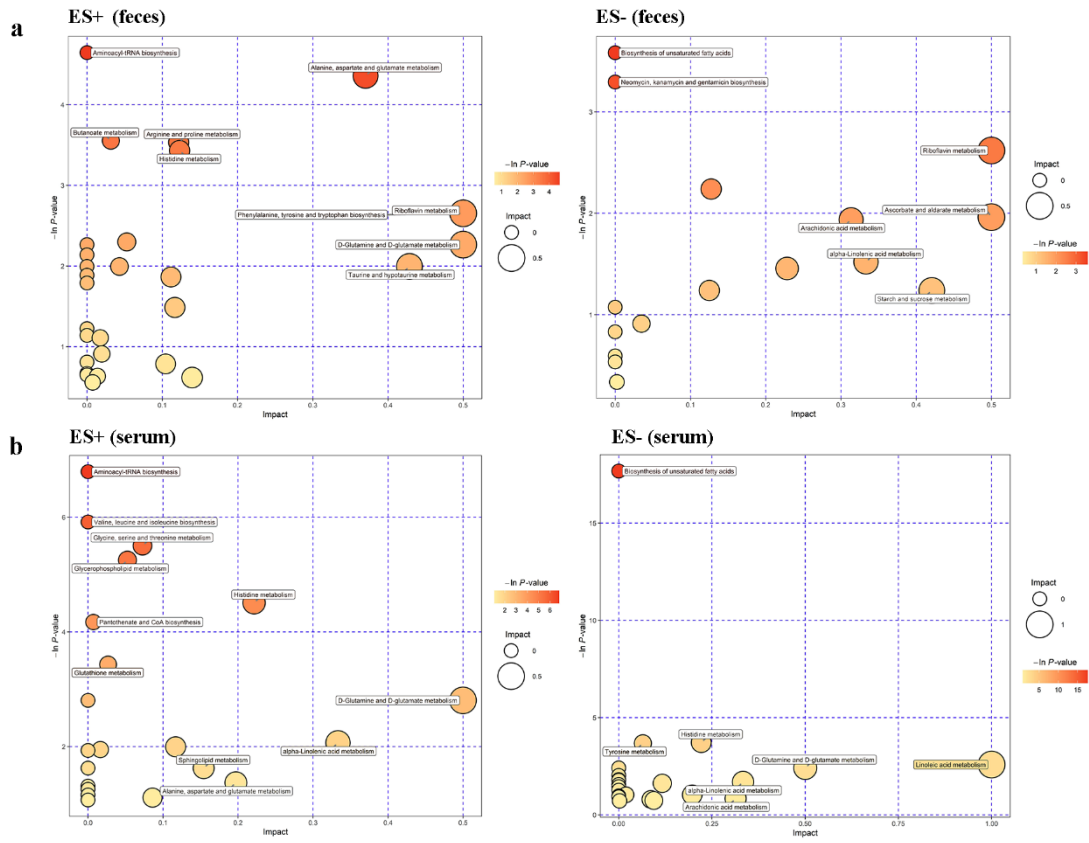

**Supplementary Figure 9.** Bubble plot of enriched pathways analysis in faeces (a) and serum samples (b) of workers with probiotic yogurt intervention vs baseline.

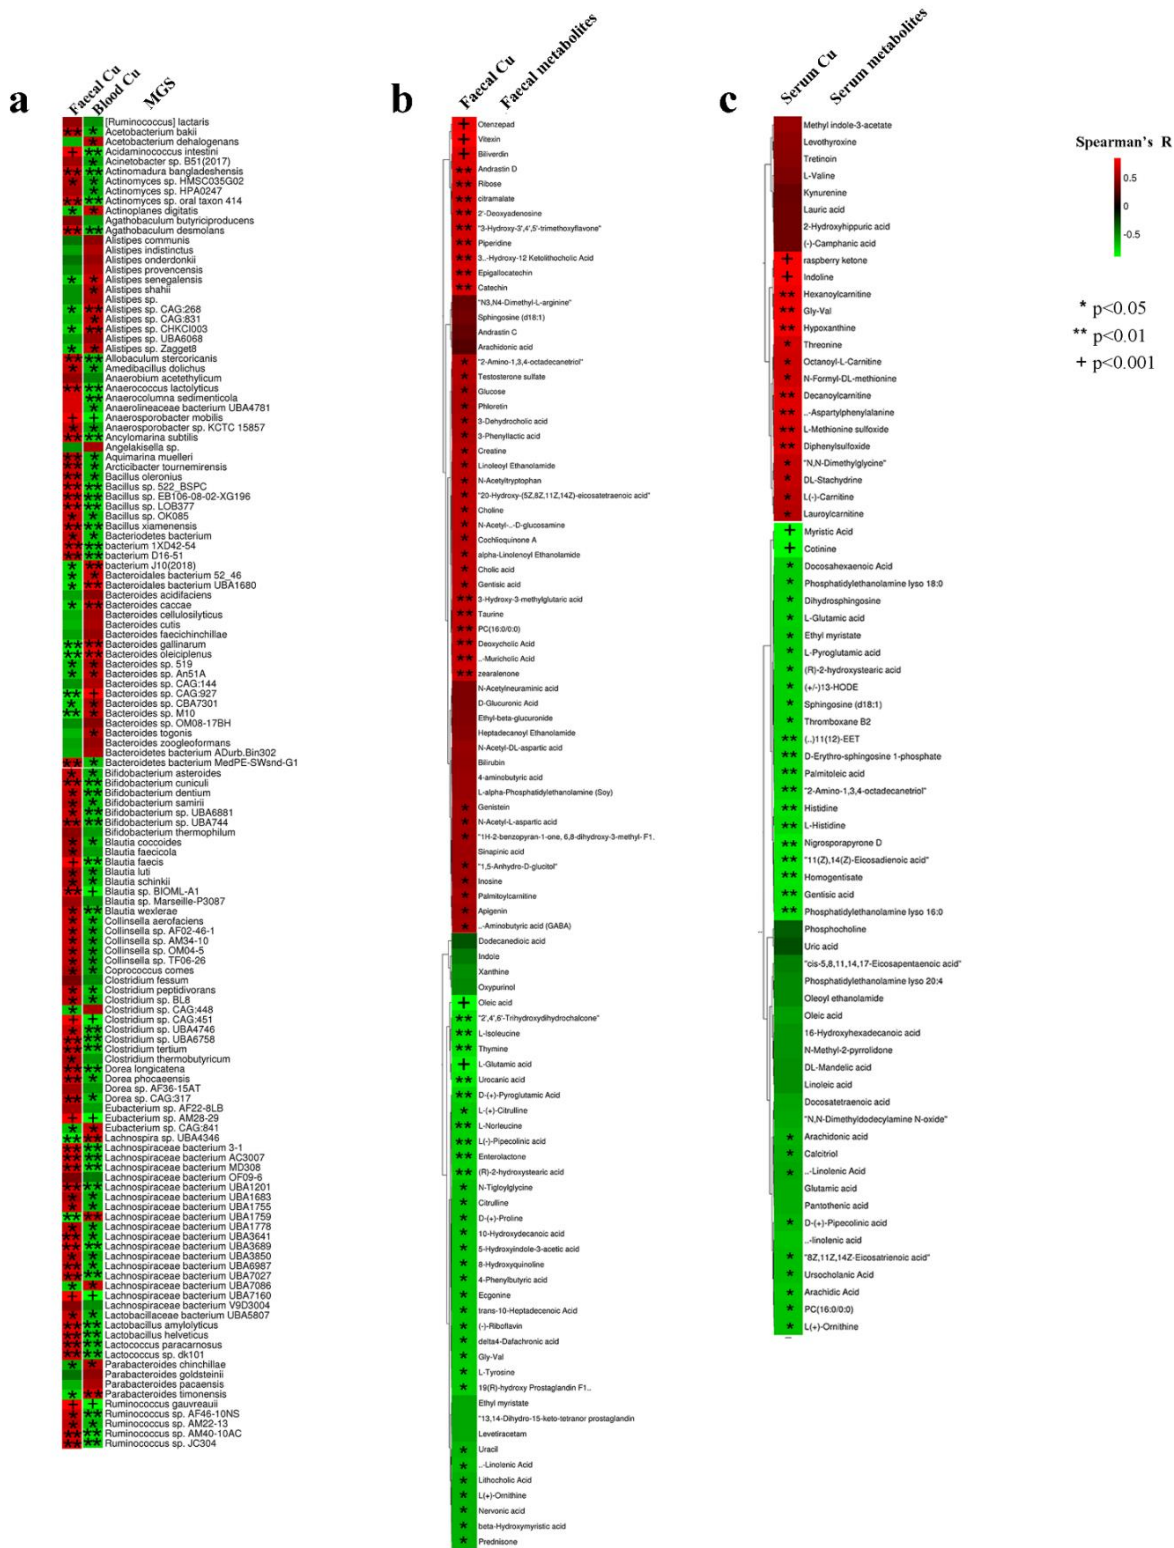

**Supplementary Figure 10.** Spearman's correlation of the members in differential MGSs, faecal metabolites or serum metabolites with blood Cu concentration or faecal Cu concentration. In the heatmap, the legend denotes correspondingly the R value of Spearman.

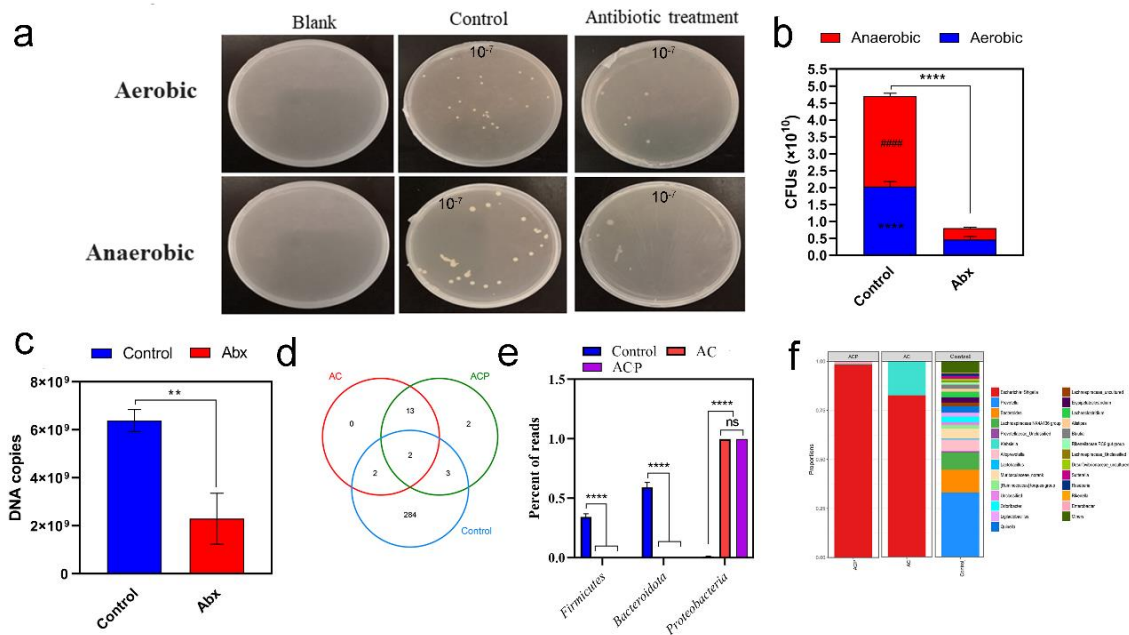

**Supplementary Figure 11. The effects of antibiotic treatment on gut microbiota of mice after 10-days treatment.** **a** The spread plate counting of culturable faecal microbes at a dilution ratio of 1: 10, 000, 000 under aerobic and anaerobic conditions. **b** Statistics of the number of viable bacteria in fresh faeces under aerobic and anaerobic conditions. **c** The absolute quantification of 16S rDNA copies in faeces of the control group and the antibiotics-treated groups. **d** Venn diagram showing the overlapping of OUT among the control group and two antibiotics-treated groups (AC, Abx+Cu; ACP, Abx+Cu+Pro) on day 10. **e** The relative abundance of GM in mice at the phylum level. The percentage of Firmicutes and Bacteroidetes reads in the two groups treated with antibiotics (the percent of Proteobacteria in the control group was too low to display in figure). **f** The relative abundance of GM in mice at the genus level. For b and c, statistical analysis was done by Wilcoxon rank-sum test. Data are represented as mean±SEM in figure b, c and e. For e, statistical analysis was done by an ordinary one-way ANOVA with Tukey' s post-hoc analysis. (\* $p < 0.05$ , \*\* $p < 0.01$ , \*\*\* $p < 0.001$ , \*\*\*\* $p < 0.0001$ , ns represents not significant).

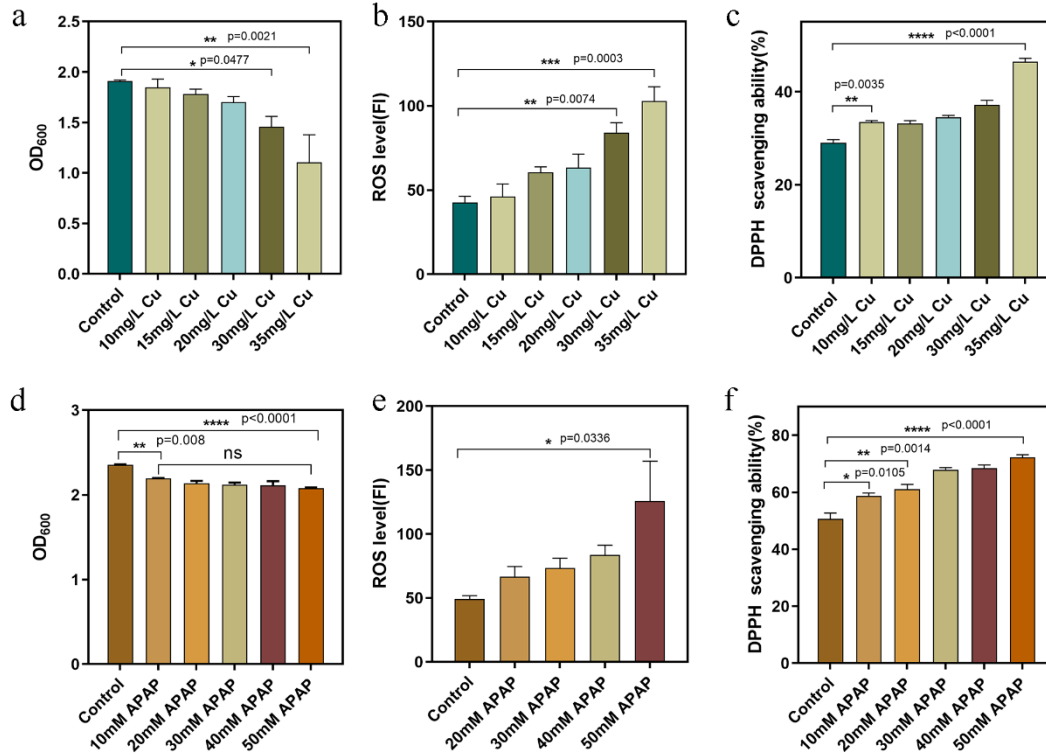

**Supplementary Figure 12. The antioxidant ability of probiotic *Pediococcus acidilactici* GR-1 against Cu and APAP.** The average optical density of GR-1 in medium with (a) Cu gradient concentration and (d) APAP gradient concentration after 12h of co-culture. ROS level of the supernatant after co-culture of (b) GR-1 and Cu and (e) GR-1 and APAP for 12h. DPPH scavenging ability of supernatant after co-culture of (c) GR-1 and Cu and (f) GR-1 and APAP for 12h. Data are represented as mean± SEM. Statistical analysis was done by one-way ANOVA with Tukey's post-hoc analysis (\* $p < 0.05$ , \*\* $p < 0.01$ , \*\*\* $p < 0.001$ , \*\*\*\* $p < 0.0001$ , ns represents not significant).

## References

- Castillo, M., S. M. Martín-Orúe, E. G. Manzanilla, I. Badiola, M. Martín and J. Gasa (2006). "Quantification of total bacteria, enterobacteria and lactobacilli populations in pig digesta by real-time PCR." *Veterinary Microbiology* **114**(1): 165-170.
- Klindworth, A., E. Pruesse, T. Schweer, J. Peplies, C. Quast, M. Horn and F. O. Glöckner (2012). "Evaluation of general 16S ribosomal RNA gene PCR primers for classical and next-generation sequencing-based diversity studies." *Nucleic Acids Research* **41**(1): e1-e1.
- Mora, D., M. G. Fortina, C. Parini and P. L. Manachini (1997). "Identification of *Pediococcus acidilactici* and *Pediococcus pentosaceus* based on 16S rRNA and *ldhD* gene-targeted multiplex PCR analysis." *FEMS Microbiology Letters* **151**(2): 231-236.
- Saravanabhavan, G., K. Werry, M. Walker, D. Haines, M. Malowany and C. Khoury (2017). "Human biomonitoring reference values for metals and trace elements in blood and urine derived from the Canadian Health Measures Survey 2007–2013." *International Journal of Hygiene and Environmental Health* **220**(2, Part A): 189-200.
